# Supplementary material for: Combination Effects of Peramivir and Favipiravir against Oseltamivir-Resistant 2009 Pandemic Influenza A(H1N1) Infection in Mice
Source: PubMed Central journal article supplement (PMC4081560; doi:10.1371/journal.pone.0101325), 2014-07-03
Supplement: pone.0101325.s001.pdf [file pone.0101325.s001.pdf]

|              |                                                                                                                           |      |       |                                                                         |                               |      |
|--------------|---------------------------------------------------------------------------------------------------------------------------|------|-------|-------------------------------------------------------------------------|-------------------------------|------|
|              | 550                                                                                                                       | 560  | 570   | 580                                                                     | 590                           | 600  |
| K09          | G C A A G T G C T T G T C A T G A T G G C A T C A A T T G G C T A A C A A T T G G A A T T T C T G G C C C A G A C A A T   |      |       |                                                                         |                               |      |
| rK09/NA:Y275 | .                                                                                                                         | .    | .     | .                                                                       | .                             | .    |
| K/2785       | .                                                                                                                         | .    | .     | .                                                                       | .                             | .    |
|              | 610                                                                                                                       | 620  | 630   | 640                                                                     | 650                           | 660  |
| K09          | G G G G C A G T G G C T G T G T T A A A G T A C A A C G G A A T A A T A A C A G A C A C T A T C A A G A G T T G G A G A   |      |       |                                                                         |                               |      |
| rK09/NA:Y275 | .                                                                                                                         | .    | .     | .                                                                       | .                             | .    |
| K/2785       | .                                                                                                                         | .    | C     | .                                                                       | .                             | .    |
|              | 670                                                                                                                       | 680  | 690   | 700                                                                     | 710                           | 720  |
| K09          | A A C A A T A T A T T G A G A A C A C A A G A G T C T G A A T G T G C A T G T G T A A A T G G T T C T T G C T T T A C T   |      |       |                                                                         |                               |      |
| rK09/NA:Y275 | .                                                                                                                         | .    | .     | .                                                                       | .                             | .    |
| K/2785       | .                                                                                                                         | .    | .     | .                                                                       | .                             | .    |
|              | 730                                                                                                                       | 740  | 750   | 760                                                                     | 770                           | 780  |
| K09          | G T A A T G A C C G A T G G A C C A A G T A A T G G A C A G G C C T C A T A C A A G A T C T T C A G A A T A G A A A A G   |      |       |                                                                         |                               |      |
| rK09/NA:Y275 | .                                                                                                                         | .    | A A T | G G A C A G G C C T C A T A C A A G A T C T T C A G A A T A G A A A A G |                               |      |
| K/2785       | .                                                                                                                         | .    | G     | .                                                                       | .                             | .    |
|              | 790                                                                                                                       | 800  | 810   | 820                                                                     | 830                           | 840  |
| K09          | G G A A A G A T A G T C A A A T C A G T C G A A A T G A A T G C C C C T A A T T A T C A C T A T G A G G A A T G C T C C   |      |       |                                                                         |                               |      |
| rK09/NA:Y275 | .                                                                                                                         | .    | .     | C A C                                                                   | T A T G A G G A A T G C T C C |      |
| K/2785       | .                                                                                                                         | .    | .     | T                                                                       | .                             | .    |
|              | 850                                                                                                                       | 860  | 870   | 880                                                                     | 890                           | 900  |
| K09          | T G T T A T C C T G A T T C T A G T G A A A T C A C A T G T G T G T G C A G G G A T A A C T G G C A T G G C T C G A A T   |      |       |                                                                         |                               |      |
| rK09/NA:Y275 | .                                                                                                                         | .    | .     | .                                                                       | .                             | .    |
| K/2785       | .                                                                                                                         | .    | .     | .                                                                       | .                             | .    |
|              | 910                                                                                                                       | 920  | 930   | 940                                                                     | 950                           | 960  |
| K09          | C G A C C G T G G G T G T C T T T C A A C C A G A A T C T G G A A T A T C A G A T A G G A T A C A T A T G C A G T G G G   |      |       |                                                                         |                               |      |
| rK09/NA:Y275 | .                                                                                                                         | .    | .     | .                                                                       | .                             | .    |
| K/2785       | .                                                                                                                         | .    | .     | .                                                                       | .                             | .    |
|              | 970                                                                                                                       | 980  | 990   | 1000                                                                    | 1010                          | 1020 |
| K09          | A T T T T C G G A G A C A A T C C A C G C C C T A A T G A T A A G A C A G G C A G T T G T G G T C C A G T A T C G T C T   |      |       |                                                                         |                               |      |
| rK09/NA:Y275 | .                                                                                                                         | .    | .     | .                                                                       | .                             | .    |
| K/2785       | .                                                                                                                         | .    | .     | .                                                                       | .                             | .    |
|              | 1030                                                                                                                      | 1040 | 1050  | 1060                                                                    | 1070                          | 1080 |
| K09          | A A T G G A G C A A A T G G A G T A A A A G G A T T T T C A T T C A A A A T A C G G C A A T G G T G T T T G G A T A G G G |      |       |                                                                         |                               |      |
| rK09/NA:Y275 | .                                                                                                                         | .    | .     | .                                                                       | .                             | .    |
| K/2785       | .                                                                                                                         | .    | .     | .                                                                       | .                             | .    |

N248D

H275Y
